# Supplementary material for: A CO 2 -independent cloud mask from Infrared Atmospheric Sounding Interferometer (IASI) radiances for climate applications
Source: Copernicus journal article supplement (doi:10.5194/amt-15-6653-2022), 2022-11-21
Supplement: Supplementary file 1 [file amt-15-6653-2022-supplement.zip]

Archive with 3 entries (3 files):
- neural_function.txt
- amt-15-6653-2022-supplement-title-page.pdf
- example.txt
