# Supplementary material for: A CO 2 -independent cloud mask from Infrared Atmospheric Sounding Interferometer (IASI) radiances for climate applications
Source: Copernicus journal article supplement (doi:10.5194/amt-15-6653-2022), 2022-11-21
Supplement: Supplementary file 1 [file amt-15-6653-2022-supplement.zip › amt-15-6653-2022-supplement-title-page.pdf]

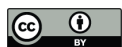

*Supplement of*

## **A CO<sub>2</sub>-independent cloud mask from Infrared Atmospheric Sounding Interferometer (IASI) radiances for climate applications**

**Simon Whitburn et al.**

*Correspondence to:* Simon Whitburn ([simon.whitburn@ulb.be](mailto:simon.whitburn@ulb.be))

- [amt-15-6653-2022-supplement-title-page.pdf](#)
- [example.txt](#)
- [neural\\_function.txt](#)

The copyright of individual parts of the supplement might differ from the article licence.
