# Supplementary material for: A CO 2 -independent cloud mask from Infrared Atmospheric Sounding Interferometer (IASI) radiances for climate applications
Source: Copernicus journal article supplement (doi:10.5194/amt-15-6653-2022), 2022-11-21
Supplement: Supplementary file 1 [file amt-15-6653-2022-supplement.zip › example.txt]

% Example

clear;

input=[0.00108239997643977	0.00106529996264726	0.00101270002778620	0.000995900016278029 ...
    0.00100539997220039	    0.000996900023892522	0.000980400014668703	0.000992099987342954 ...
    0.000983100035227835	0.000970499997492880	0.000976899988017976	0.000963400001637638 ...
    0.000965300016105175	0.000948100001551211	0.000955499999690801	0.000948300003074110 ...
    0.000946899992413819	0.000943300023209304	0.000935300020501018	0.000934000010602176 ...
    0.000929299974814057	0.000708299980033189	0.000724699988495559	0.000665800005663186 ...
    0.000689400010742247	0.000614700024016202	0.000634900003205985	0.000577199971303344 ...
    0.000594499986618757	0.000543300004210323	2.11900005524512e-05	2.09800000448013e-05 ...
    2.36600008065579e-05	2.09200006793253e-05	2.30200002988568e-05	2.27700002142228e-05 ...
    1.76699995790841e-05	1.59499995788792e-05	2.16299995372538e-05	2.16499993257457e-05 ...
    1.62100004672539e-05	1.54999997903360e-05	2.01200000446988e-05	1.48899998748675e-05 ...
    1.98199995793402e-05	1010.50000000000]'; % 45 IASI channels + orography

output = neural_function(input);
